# 1           **Efficient, high-throughput ligand incorporation into protein** 2                                   **microcrystals by on-grid soaking**

3  
4                                   **Michael W. Martynowycz<sup>1,2,3</sup> and Tamir Gonen<sup>1,2,3</sup>**

5  
6    1. Department of Biological Chemistry, University of California Los Angeles, 615 Charles E Young Drive  
7        South, Los Angeles, CA90095

8    2. Department of Physiology, University of California Los Angeles, 615 Charles E Young Drive South, Los  
9        Angeles, CA90095

10   3. Howard Hughes Medical Institute, University of California Los Angeles, Los Angeles, CA90095

11   \$ [tgonen@g.ucla.edu](mailto:tgonen@g.ucla.edu)

## 12 13   **Abstract**

14   A method for soaking ligands into protein microcrystals on TEM grids is presented. Every  
15   crystal on the grid is soaked simultaneously using only standard cryoEM vitrification  
16   equipment. The method is demonstrated using proteinase K microcrystals soaked with  
17   the 5-amino-2,4,6-triodoisophthalic acid (I3C) magic triangle. A soaked microcrystal is  
18   milled to a thickness of 200nm using a focused ion-beam, and microcrystal electron  
19   diffraction (MicroED) data are collected. A high-resolution structure of the protein with four  
20   ligands at high occupancy is determined. Compared to much larger crystals investigated  
21   by X-ray crystallography, both the number of ligands bound and their occupancy was  
22   higher in MicroED. These results indicate that soaking ligands into microcrystals in this  
23   way results in a more efficient uptake than in larger crystals that are typically used in drug  
24   discovery pipelines by X-ray crystallography.

## 1 **Introduction**

2 Atomic resolution structures are critical to understanding how proteins and small  
3 molecules interact. Crystal structures of small molecule pharmaceuticals are also  
4 important to determine how drugs are formulated in their delivery (Datta and Grant, 2004).  
5 Knowing how the atoms in a molecule are arranged allow for rational design of ligands  
6 such as drugs to bind and inhibit or stimulate protein function (Daga et al., 2010; He et  
7 al., 2010). Investigation of protein structures with these small molecule ligands bound is  
8 an important step in drug discovery and optimization (Blundell, 2017; Kuhn et al., 2002;  
9 Tickle et al., 2004). Macromolecular crystallography has been adapted to investigate  
10 these ligand-protein interactions by incorporating the ligand into the protein crystal lattice  
11 by either soaking ligands into crystals or, more often, by co-crystallizing the protein with  
12 the ligand (Beck et al., 2009). Successfully coercing ligands into protein crystals is  
13 challenging (McNae et al., 2005). Co-crystallization of the protein with the ligand can  
14 change the crystallization condition or result in the ligand forming close contacts between  
15 protein molecules in the lattice instead of effectively diffusing into the binding site  
16 (Reynolds, 2014). Soaking already formed crystals with ligands is also used (Beck et al.,  
17 2009; Lebioda and Zhang, 1992; López-Jaramillo et al., 2002). Crystals soaked with  
18 ligands will often crack or dissolve as the additional ligand diffuses into the protein lattice.  
19 Cracked or dissolved crystals typically do not diffract well, resulting in either a low-  
20 resolution structure or no structure at all. Moreover, soaking ligands into large crystals is  
21 difficult because diffusion over long distances is inefficient leading to low occupancy in  
22 the crystallographic maps and an ambiguous solution. Therefore, a large challenge in  
23 ligand soaking experiments for large macromolecular crystals arises in modeling the weak

1 density that the ligands occupy (Liebschner et al., 2017; Pearce et al., 2017; Pozharski  
2 et al., 2013).

3 Microcrystal electron diffraction (MicroED) is an electron cryo-microscopy  
4 (cryoEM) method for determining atomic resolution structures from protein microcrystals  
5 (Brent L Nannenga et al., 2014; Brent L. Nannenga et al., 2014; Shi et al., 2013). MicroED  
6 has been used to solve novel protein and small molecule pharmaceutical crystal  
7 structures (de la Cruz et al., 2017; Gruene et al., 2018; Jones et al., 2018; Rodriguez et  
8 al., 2015; Xu et al., 2019). Previous ligand-protein interactions determined using MicroED  
9 relied on co-crystallization or incubation of the protein and ligand in crystallization drops  
10 prior to applying the crystals to the grid (Clabbers et al., 2020; Purdy et al., 2018; Seidler  
11 et al., 2018). In this way, novel co-crystals of the HIV-GAG bevirimat complex were  
12 determined (Purdy et al., 2018). The first-generation HIV-I maturation inhibitor bevirimat  
13 was found to occupy the six-fold axis of the protein hexamer along the c axis of the unit  
14 cell. The density suggested that the drug bound in this position to any of the six protein  
15 interfaces, and served as a non-specific inhibitor of the protein capsid, ultimately  
16 preventing maturation of the viral capsid. A more recent investigation of protein  
17 microcrystals using MicroED was also able to correctly locate the inhibitor acetazolamide  
18 (AZM) in the active site of active site of human carbonic anhydrase isoform II (HCA II)  
19 after adding AZM to the crystallization drops (Clabbers et al., 2020). Time resolved  
20 experiments that expose the protein to a ligand just prior to vitrification for cryoEM imaging  
21 were similarly pioneered by Unwin using acetylcholine receptor helical tubes (Unwin,  
22 1995).

1           We now demonstrate a simple method for efficiently soaking small molecule  
2 ligands into pre-formed microcrystals directly on the TEM grid just prior to vitrification. The  
3 method involves first applying crystals to a grid similarly to any other cryoEM experiment,  
4 back blotting, adding the ligand solution, and back blotting again prior to vitrification by  
5 plunging into liquid ethane. This method is demonstrated by on-grid soaking the I3C  
6 “magic triangle” ligand into microcrystals of the enzyme proteinase K. On-grid soaking is  
7 coupled with cryo-FIB milling which removes any excess material surrounding the crystals  
8 thereby increases the quality of data from the selected crystal as inelastic scattering is  
9 minimized and the ideal crystal thickness is used. Cryo-FIB milling also allows  
10 investigation of ligand soaked protein crystals of any size, that greatly expands the scope  
11 of the method (Duyvesteyn et al., 2018; Martynowycz et al., 2019). The data shows that  
12 the I3C ligand soaks into the crystals with higher efficiency when compared to using X-  
13 ray crystallography with much larger crystals obtained under similar conditions. These  
14 results have far-reaching implications in future investigations utilizing MicroED for drug  
15 discovery and optimization. The approach may also serve as a platform for soaking  
16 experiments of interest in other cryoEM modalities, such as single particle or  
17 cryotomography.

18

## 19 **Results**

20 **Soaking the ligand into the crystals.** Proteinase K crystals were grown in batch to an  
21 average size of 1-20 $\mu$ m. Crystal slurry was applied by a pipette to the carbon side of the  
22 grid, and the grid was blotted from the back inside a temperature and humidity controlled  
23 blotting chamber. In this way, the liquid flows through the holes of the holey carbon film

1 and the crystals remain on the grid. The grid essentially acts as a filter for the crystals. To  
2 the grid of blotted crystals, I3C solution was added and allowed to incubate. This step is  
3 mimetic of soaking a looped crystal into a ligand solution as typically done in X-ray  
4 crystallography (Beck et al., 2009; McNae et al., 2005). Following incubation, the grid was  
5 blotted from the back again, and immediately plunged into liquid ethane (Figure 1). The  
6 grids were then transferred to either a Thermo-Fisher Aquilos dual beam FIB/SEM or a  
7 Thermo-Fisher Talos Arctica TEM for inspection (Figure 1).

8  
9 **Identification and selection of ligand soaked crystals.** Crystals on the TEM grid were  
10 identified in the SEM after platinum coating as described previously (Martynowycz et al.,  
11 2019; Martynowycz et al., 2019; Wolff et al., 2020). The crystal density was high with  
12 crystals being present over both the holey carbon film and the film above the grid bars  
13 (Figure 1). A target crystal was identified in both SEM and FIB imaging (Figure 2) next to  
14 two other crystals approximately at the center of a grid square. These crystals measured  
15 between 3-10 $\mu$ m across. The view of the back crystal was occluded in the FIB image at  
16 18° by another crystal near the grid bar.

17  
18 **Cryo-FIB milling.** The occluding crystals in front of and abutting the crystal of interest  
19 were removed by milling to access the target crystal (Figure 2). Rough milling was done  
20 in cleaning cross sections from both the top and bottom of the desired lamella location. A  
21 final thickness of ~200nm was achieved after two polishing steps using a very low gallium  
22 beam current.

23

1 **MicroED data collection.** The grid was cryo-transferred to a Talos Arctica TEM for  
2 MicroED data collection. Crystal lamellae were identified by taking a low-magnification  
3 montage within the MicroED software EPU-D (Thermo Fisher). The target lamella  
4 appeared as a long streak of white with a semitransparent lamella suspended in the gap.  
5 The crystal was screened for diffraction by collecting a single diffraction image at 0° for  
6 1s using a 70µm selected area aperture to isolate the signal from a small area of the  
7 target crystal. Reflections to better than 2Å were observed (Figure 2) indicating that the  
8 target crystal was well ordered and suitable for MicroED data collection. A continuous  
9 rotation MicroED data set was collected over a total of 60°.

10

11 **MicroED data analysis.** MicroED data were indexed, integrated, and scaled in DIALS as  
12 described (Clabbers et al., 2018; Parkhurst et al., 2016; Waterman et al., 2016; Winter et  
13 al., 2018). A resolution cutoff was applied after integration at 1.78Å, where the  $CC_{1/2}$  fell  
14 to a value of 0.33 (Table 1). This dataset from a single crystal was found to yield an overall  
15 completeness of 94.5%, a  $I/\sigma I$  of 7.8, and  $R_{pim}$  of 14%.

16

17 **Structure determination and modeling.** Molecular replacement (McCoy et al., 2007)  
18 was performed using the proteinase K model with PDBID 6CL7 to determine the structure.  
19 This model of proteinase K contains no solvent or ions in the model, making it ideal for  
20 molecular replacement when looking for ligands. A single, unambiguous solution in  $P 4_3$   
21  $2_1 2$  was found. The initial solution from molecular replacement was inspected for  
22 differences in the density corresponding to ligands. We found >25 peaks in the  $F_o - F_c$  map  
23 with values  $>6\sigma$ . From these peaks, four I3C ligands could be immediately identified in

1 both the  $2F_o-F_c$  and  $F_o-F_c$  maps (Figure 3). Prior to placing and refining the molecules,  
2 the rings of the I3C molecules were apparent - in some cases even without lowering the  
3 contour levels. The quality of these maps made for simple, unambiguous identification of  
4 the ligand molecules without any special treatment -such as Polder maps (Liebschner et  
5 al., 2017)- of the density.

6  
7 **Structure refinement.** After placing the four I3C ligands, the structure was refined and  
8 solvent molecules were added automatically using Phenix.refine (Afonine et al., 2012).  
9 Another round of refinement was conducted that allowed the occupancy of the I3C  
10 molecules to vary. The four I3C ligands were found to have occupancies between 58 and  
11 75%, with average B-factors of  $20 \text{ \AA}^2$ . These B-factors are approximately equal to that of  
12 the modeled solvent atoms, and slightly higher than the average B-factor of the protein  
13 ( $13 \text{ \AA}^2$ ). The entire model was refined using individual B-factors, rather than group B-  
14 factors for the ligands, and resulting in a final  $R_{\text{work}}$  and  $R_{\text{free}}$  of 16.9% and 20.9%,  
15 respectively, attesting to the quality of the data. Detailed data collection and refinement  
16 statistics are presented in **Table 1**.

17  
18 **Comparing soaking in X-ray crystallography with MicroED.** Large proteinase K  
19 crystals were previously soaked with I3C and the structure determined by X-ray  
20 crystallography to  $1.76 \text{ \AA}$  resolution with  $R_{\text{work}}$  of 14.0% and  $R_{\text{free}}$  of 19.1% (Beck et al.,  
21 2010). The X-ray study took advantage of anomalous scattering to identify the positions  
22 of the soaked I3C molecules and allowed the identification of 3 unique I3C molecules  
23 bound to the protein (Figure 4). Only one of the I3C ligands had high occupancy (75%)

1 while the other two had occupancies of only 21% and 12%. In sharp contrast, soaking  
2 into much smaller crystals with MicroED identified 4 unique I3C molecules bound to  
3 Proteinase K. Importantly, all four I3C ligands have high occupancies – 75%, 61%, 59%  
4 and 58%.

5

## 6 **Discussion**

7 We demonstrate that soaking ligands into tiny crystals used for MicroED carries distinct  
8 advantaged over soaking experiments using large crystals for X-ray crystallography.  
9 Diffusion into small protein crystals is extremely efficient (Geremia et al., 2006). The  
10 Proteinase K soaking experiment with I3C presents an ideal test sample because a  
11 similar study was conducted by X-ray crystallography where both the resolution that was  
12 obtained (1.76 Å in X-ray and 1.78 Å in MicroED) and the refinement ( $R_{\text{work}}$  of 14.0% and  
13  $R_{\text{free}}$  of 19.1% in X-ray versus  $R_{\text{work}}$  and  $R_{\text{free}}$  of 16.9% and 20.9% in MicroED) were similar  
14 in both studies.

15 The crystals used for the X-ray study were at least 100x larger (Beck et al., 2010)  
16 than the crystals used here. Though the final resolutions were similar, our study identified  
17 an additional I3C ligand and all ligands had high occupancy and appeared clearer omit  
18 maps when compared with the X-ray study (Figure 4). The data suggest that ligands such  
19 as I3C may soak into much smaller crystals more efficiently without sacrificing map quality  
20 or resolution enabling rapid drug discovery pipelines to be utilized effectively.

21 Investigating ligand-protein interactions using on-grid soaking has several  
22 advantages to typical macromolecular X-ray crystallography ligand soaking pipelines. By  
23 placing an entire crystallization drop on the grid, hundreds or even thousands of micro-



1 and nanocrystals can be soaked simultaneously in a single step . In X-ray crystallography  
2 traditionally crystals are individually looped, soaked into a high concentration ligand  
3 solution, back soaked into a cryo-protective solution, and then plunged into liquid  
4 nitrogen. This approach is lengthy, requires a high degree of dexterity and a lot of material  
5 and has multiple points of failure from operator error. The on-grid method presented here  
6 soaks thousands crystals at once, using less than 1% of the amount of ligand needed for  
7 X-ray crystallography, requires no manual manipulation of the individual crystals, and  
8 does not require a cryo-protective back soak, since crystals vitrified using supercooled  
9 ethane typically show no solvent rings (Figure 2). Moreover, the crystals used here are  
10 extremely small so they would pose a considerable challenge to accurately fish out with  
11 a nylon loop and optimally shoot at synchrotron end stations even with microfocus  
12 capabilities.

13         The additional step of a dual beam FIB/SEM to this method adds significant utility.  
14 Milling protein crystals has recently seen a high amount of interest for preparing crystals  
15 that are too small for synchrotron X-ray experiments, but still too large for MicroED. By  
16 milling the ligand soaked crystals we are no longer limited to crystals that happen to be  
17 in thin ice and happen to be smaller than 1 $\mu$ m thick, though this method is still tractable  
18 when a FIB/SEM is unavailable by means of crystal fragmentation (de la Cruz et al., 2017;  
19 Martynowycz et al., 2017). Using the FIB/SEM, even crystals large enough for  
20 synchrotron or home source X-ray experiments become amenable to MicroED.

21         On a single grid, crystals can be found in a variety of sizes (Figure 1). Since all the  
22 crystals on the grid have been subjected to the same soaking condition without  
23 differences between operators or soaking techniques, a systematic investigation of

1 different crystal sizes and ligand occupancies is possible and would be of great interest.  
2 Furthermore, cryo-FIB milling of ligand soaked crystals in specific regions of individual  
3 crystals provides a unique opportunity for investigation of sub crystalline domains that  
4 may not be possible using other means.

5  
6 We present a method for high throughput, on-grid soaking of ligands into protein  
7 microcrystals that is fast, simple, and effective. On-grid soaking of protein microcrystals  
8 is demonstrated and shown to effectively incorporate ligands. The results suggest that  
9 soaked microcrystals of the same protein-ligand complex have higher occupancy and  
10 number of ligands bound than using a much larger crystal required for X-ray experiments.  
11 Soaking microcrystals on TEM grids may even prove to be a preferable emerging method  
12 for synchrotron X-ray investigations. Recent results have shown that vitrified protein  
13 microcrystals on TEM grids can be located ahead of time using an SEM, and then  
14 subsequently used for X-ray diffraction experiments. Alternatively, rastering of the grid at  
15 synchrotron end points can also be used. We also envision applications for single particle  
16 cryoEM and cryotomography workflows where active compounds are added on-grid and  
17 allowed to interact just before vitrification, allowing for time resolved investigations of  
18 ligand activity on varying scales. The approach described herein has implications for drug  
19 discovery and optimization, the investigation of protein-ligand interactions, and  
20 investigating the properties of how ligands interact with and flow through protein crystals.

21

22 **Acknowledgements**

1 This study was supported by the National Institutes of Health P41GM136508. The Gonen  
2 lab is supported by funds from the Howard Hughes Medical Institute. The structure factors  
3 and coordinates for the on-grid soaked Proteinase K structure will be deposited in the  
4 PDB. The associated maps will be deposited at the EMDB. We would like to thank Johan  
5 Hattne for useful discussions.

6

### 7 **Competing interests**

8 A patent filing accompanies this work UCH-24160 UCLA GONEN 20200514 2020-883.

9

### 10 **Materials and Methods**

11 **Materials.** Proteinase K (*E. Album*) was purchased from Sigma and used without further  
12 purification. 5-amino-2,4,6-triiodoisophthalic acid (I3C) magic triangles were purchased  
13 from Hampton and prepared as described (Beck et al., 2010).

14

15 **Crystallization.** Proteinase K crystals were grown in batch by dissolving 5mg of  
16 lyophilized proteinase K powder into 1 mL of 1.25M ammonium sulfate at 4°C. Crystals  
17 between 1-50µm were formed within one day, and typically microcrystals were visible  
18 under the light microscope within minutes. The crystal soaking solution was 1.25M  
19 ammonium sulfate 0.1M I3C.

20

21 **Grid preparation.** Quantifoil R2/2 Cu200 grids were glow discharged for 30s immediately  
22 prior to use. Grids were loaded on to a Leica GP2 cryo-plunger inside of a cold room held  
23 at 4°C and 35% relative humidity. The blotting chamber was set to 4°C and 90% humidity.

1 Filter paper was added prior to use, and the system was allowed to equilibrate for 15 mins  
2 prior to use. Grids were loaded into the plunger and 3 $\mu$ L of proteinase K slurry were  
3 applied to the carbon side (front) of the grid and allowed to incubate with the protein drop  
4 for 30s. The grid was then gently blotted from the back (copper side) for 20s. After blotting,  
5 3 $\mu$ L of the crystal soaking solution (1.25M ammonium sulfate, 0.1M I3C) was added to  
6 the same grid and allowed to incubate again for 20s. The grids were then blotted again  
7 from the back for 20s and immediately plunged into liquid ethane and transferred to liquid  
8 nitrogen for storage.

9  
10 ***Cryo-FIB milling of the protein crystals.*** Stored grids were clipped with the carbon  
11 facing side up and transferred into a cryogenically cooled Thermo-Fisher Aquilos dual  
12 beam FIB-SEM for milling. Grid clips were marked with a dot on the top with a sharpie to  
13 indicate the milling direction. A thin layer of platinum (~10nm) was deposited on the grids  
14 by sputter coating prior to inspecting the grids using the SEM (Michael W Martynowycz  
15 et al., 2019). An additional layer (~300nm) of carbon-rich platinum was added on top of  
16 this using the gas injection system. We applied the GIS platinum layer in the mapping  
17 position to prevent shadowing of the platinum layer and opened the GIS valve at 12mm  
18 rather than 7mm in order to have a slower, more controlled deposition. Crystals were  
19 identified in the SEM and FIB, brought to eucentric height, and milled using cleaning cross  
20 sections in steps into lamellae until a thickness of ~200nm as described (Duyvesteyn et  
21 al., 2018; Michael W. Martynowycz et al., 2019). The final polishing step used a gallium  
22 beam current of 10pA to remove the last few nm of crystal from the lamellae (Michael W  
23 Martynowycz et al., 2019).

1  
2 **MicroED data collection.** MicroED data collection was performed very similarly to  
3 previous experiments (Hattne et al., 2019, 2018, 2015; Jason de la Cruz et al., 2019;  
4 Martynowycz et al., 2020; Michael W Martynowycz et al., 2019; Michael W. Martynowycz  
5 et al., 2019). Grids with milled crystals were transferred to a Thermo-Fisher Talos Arctica  
6 transmission electron microscope after rotating the grids by 90°. Rotation by 90° assures  
7 the tilt axis during MicroED data collection is perpendicular to the milling direction,  
8 allowing for a greater rotation range of the crystal lamellae. The TEM was operated at  
9 liquid nitrogen temperature at an accelerating voltage of 200kV. Data were collected  
10 between the real space wedge between -30 and +30° at a rate of 0.25 °/s. Frames were  
11 read out every 1s and binned by 2. The total exposure to the crystal lamellae was 2.4 e<sup>-</sup>  
12 Å<sup>-2</sup>. The diffraction distance was set to 1900mm which corresponds to a crystal to detector  
13 distance of 1853mm after taking post-column magnification into account. Camera length  
14 was calibrated using diffraction from an aluminum film prior to loading the protein grid and  
15 to check for any distortions in the diffraction (Clabbers et al., 2018, 2017).

16  
17 **MicroED data processing.** Data were converted from MRC to SMV format as described,  
18 and an ADSC offset of 512 was applied to compensate for negative bias and pixel  
19 truncation (Hattne et al., 2016). The data were indexed, integrated, and scaled in DIALS  
20 using the general linear background model using a frame pedestal of 512 and a detector  
21 gain of 14 (Clabbers et al., 2018; Parkhurst et al., 2016). A resolution cutoff of 1.78Å was  
22 selected by the  $CC_{1/2} = 0.33$  criterion (Evans and Murshudov, 2013; Karplus and  
23 Diederichs, 2012). The structure was determined by molecular replacement in PHASER

1 using the search model PDB 6CL7 using electron scattering factors (Hattne et al., 2018;  
2 McCoy et al., 2007). The TFZ and LLG of the solution were 69.1 and 6856, respectively.  
3 Four I3C molecules were visible in the density prior to any refinement or modeling. These  
4 are apparent as the I – I distance is known to be ~6Å (Beck et al., 2008). The four I3C  
5 molecules were placed manually in COOT using the get monomer command using the  
6 three letter code I3C (Emsley and Cowtan, 2004). The structure was refined in  
7 Phenix.refine using electron scattering factors after creating restraints in Elbow as  
8 described (Afonine et al., 2012; Moriarty et al., 2009). The final model was refined using  
9 individual isotropic B-factors for the protein, solvent molecules, and I3C molecules.  
10 Occupancy was allowed to vary for the I3C molecules. Omit maps for MicroED in Figure  
11 3,4 were generated directly after molecular replacement without further modification. For  
12 comparison, the coordinates and structure factors from PDB 3gt4 were downloaded, all  
13 ligands and solvent were removed, and  $2F_o-F_c$  and  $F_o-F_c$  maps were generated.

14  
15 **Figures and tables.** Figures were arranged in Microsoft Powerpoint. Images were  
16 adjusted and cropped in FIJI (Schindelin et al., 2012). Tables were arranged in Microsoft  
17 Excel. Protein models and meshes were generated using PyMol (Schrödinger LLC,  
18 2014).

19  
20  
21  
22  
23

1 **Table and Figure Legends**

2 **Table 1. Refinement statistics for a proteinase K microcrystal soaked with I3C.**

**Table 1.** Refinement statistics for a proteinase K microcrystal soaked with I3C

| <b>Proteinase K soaked on-grid with I3C</b> |                                   |
|---------------------------------------------|-----------------------------------|
| Wavelength (Å)                              | 0.0251                            |
| Resolution range (Å)                        | 43.32 - 1.78 (1.844 - 1.78)       |
| Space group (#)                             | P 4 <sub>3</sub> 2 <sub>1</sub> 2 |
| Unit cell (a = b, c, α = β = γ)             | 67.55, 102.77, 90                 |
| Total reflections                           | 109326 (10458)                    |
| Multiplicity                                | 4.9 (4.8)                         |
| Completeness (%)                            | 94.52 (94.56)                     |
| Mean I/sigma(I)                             | 7.83 (2.19)                       |
| Wilson B-factor                             | 14.37                             |
| R <sub>merge</sub>                          | 0.2622 (0.9953)                   |
| R <sub>pim</sub>                            | 0.1304 (0.5076)                   |
| CC <sub>1/2</sub>                           | 0.971 (0.365)                     |
| R <sub>work</sub>                           | 0.1694                            |
| R <sub>free</sub>                           | 0.2094                            |
| Number of non-hydrogen atoms                | 2339                              |
| macromolecules                              | 2029                              |
| ligands                                     | 64                                |
| solvent                                     | 246                               |
| RMS (bonds)                                 | 0.005                             |
| RMS (angles)                                | 0.74                              |
| Ramachandran favored (%)                    | 97.83                             |
| Ramachandran allowed (%)                    | 2.17                              |
| Ramachandran outliers (%)                   | 0                                 |
| Rotamer outliers (%)                        | 0                                 |
| Clashscore                                  | 5.21                              |
| Average B-factor                            | 13.51                             |
| macromolecules                              | 12.59                             |
| ligands                                     | 19.44                             |
| solvent                                     | 19.61                             |

3

4

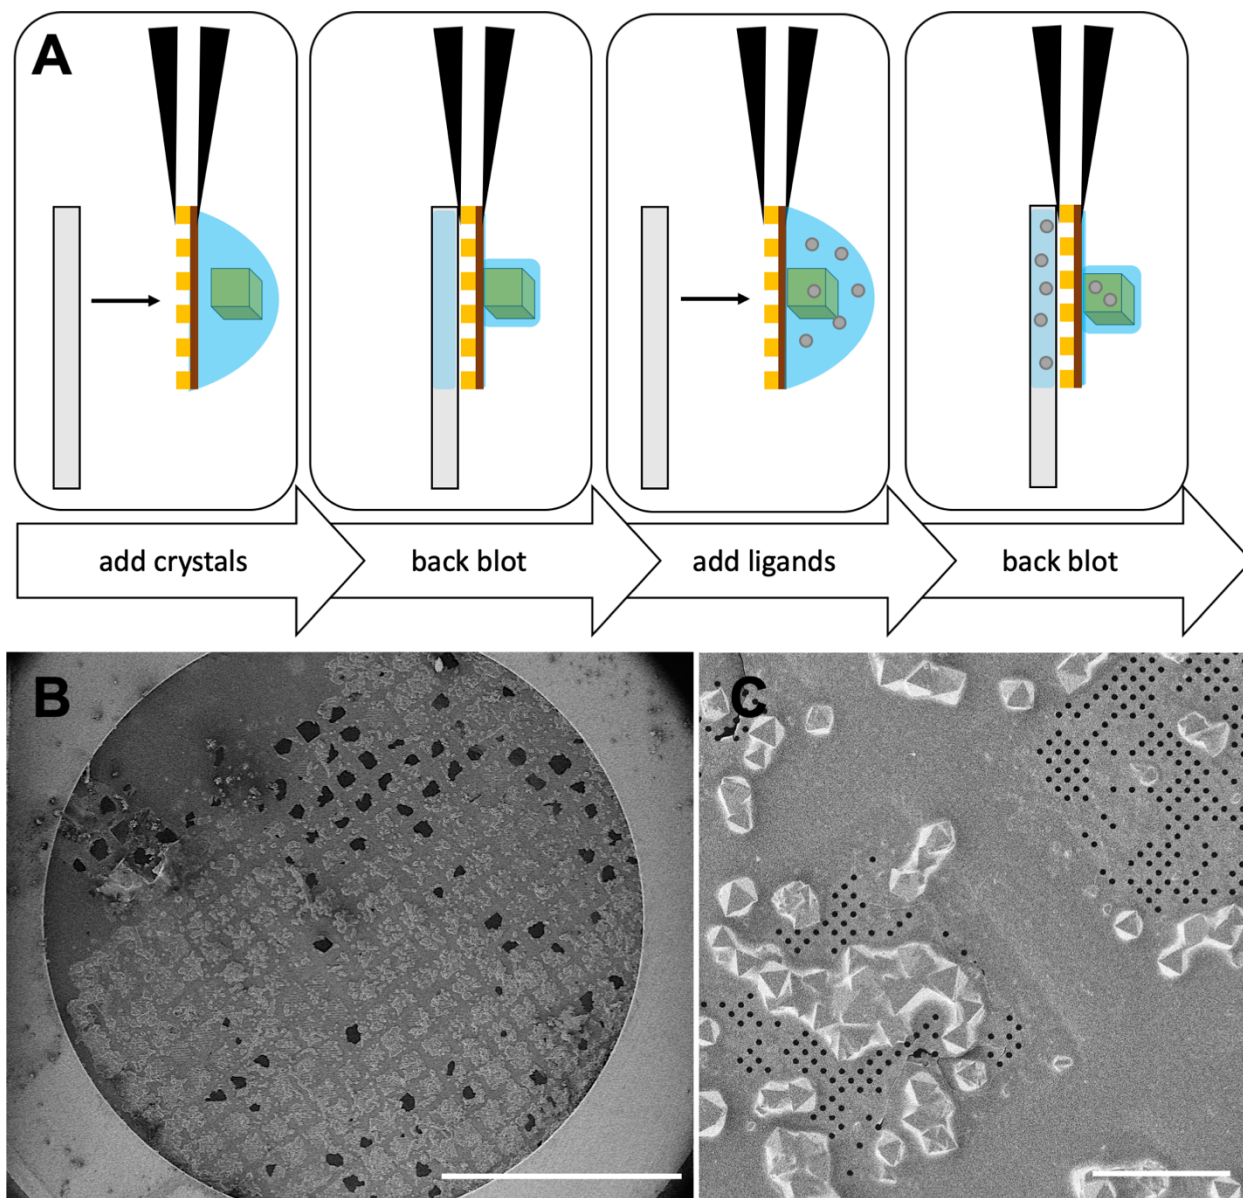

**Figure 1**

1  
2 **Figure 1. On-grid soaking of ligands into protein microcrystals.** (A) Schematic  
3 cartoon of the on-grid soaking procedure. From left to right: protein solution is applied to  
4 the carbon side of a glow-discharged holey carbon film, the grid is blotted from the back  
5 in high humidity for ~20s, the ligand solution is applied to the same grid and allowed to  
6 incubate for 20s, the grid is blotted from the back again for ~20s. The grid is then vitrified



1 by plunging into liquid ethane and stored in liquid nitrogen. (B) SEM image of a grid after  
2 on-grid soaking of proteinase K crystals with I3C solution with hundreds of crystals to be  
3 potentially investigated. (C) High resolution SEM image showing crystal density and  
4 distribution. Scale bar 1mm in (B) and 50 $\mu$ m in (C).

5  
6

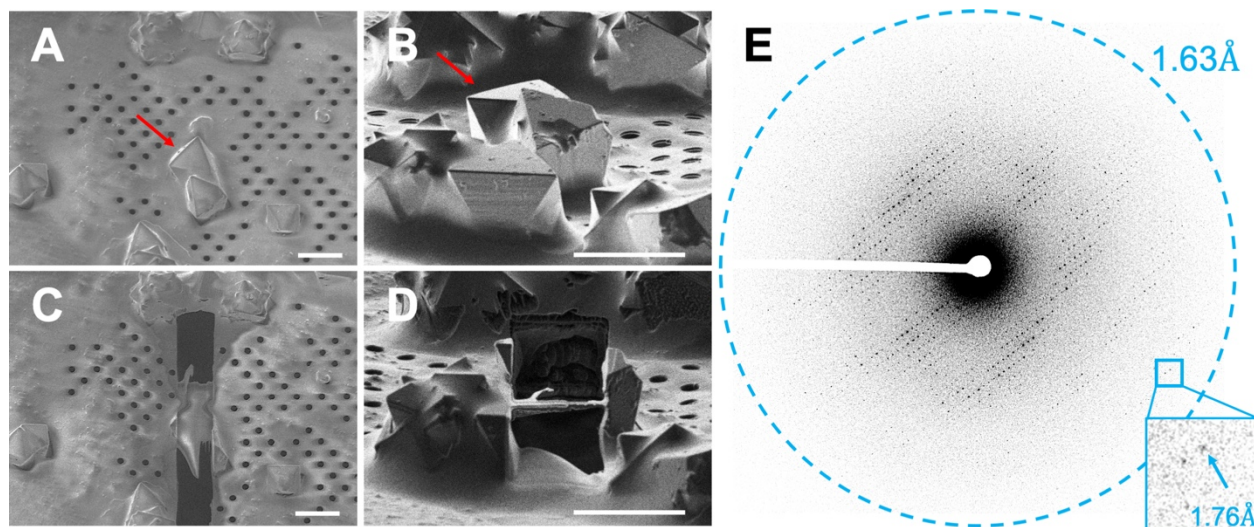

**Figure 2**

7  
8 **Figure 2. Cryo-FIB milling of a proteinase K microcrystal soaked with I3C.** (A) SEM  
9 and (B) FIB images of a 10 $\mu$ m protein crystal before cryo-FIB milling. The crystal after  
10 milling the back crystal to a thickness of 200nm imaged using the (C) SEM and (D) FIB.  
11 (E) The resulting diffraction from this lamella at 0° for 1s. Inset showing visible high  
12 resolution spots. Scale bars 10 $\mu$ m in all images. Red arrow indicates crystal selected for  
13 investigation.

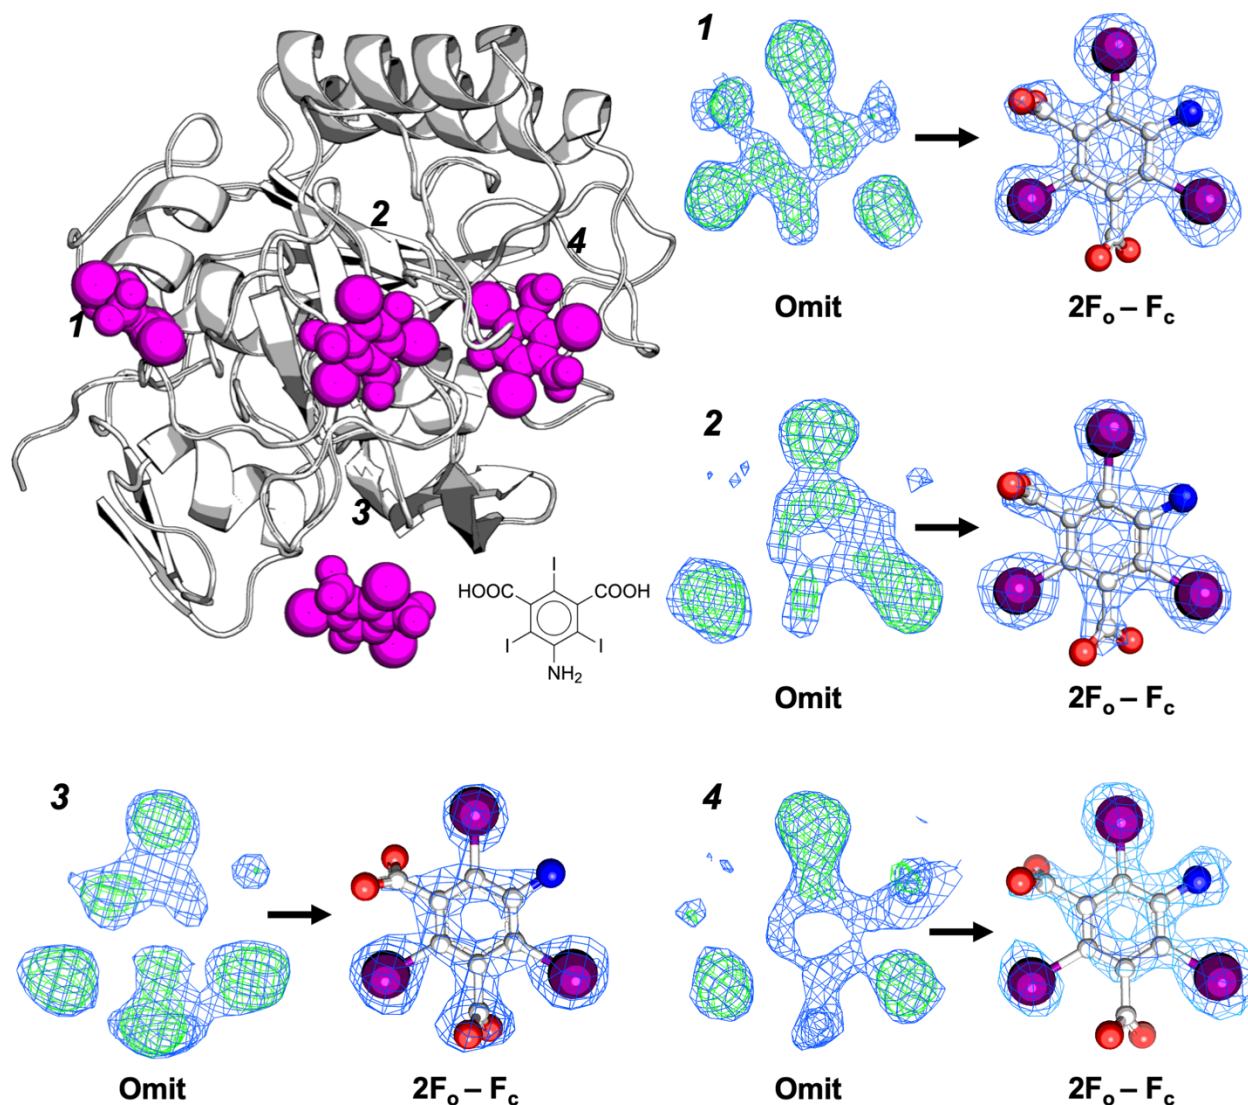

**Figure 3**

1  
2 **Figure 3. I3C ligands soaked into the protein lattice.** (Top Left) Cartoon representation  
3 of the determined protein (beige) and the identified ligand binding sites in magenta  
4 spheres. Chemical structure of the I3C magic triangle appears at the bottom right of the  
5 protein cartoon. (Right and bottom) corresponding numbered sites with their densities  
6 before modeling (left side), and after the ligand was modeled and refined (right). Blue  
7 meshes are  $2F_o - F_c$  maps contoured at the  $1.0\sigma$  level, and green meshes are  $F_o - F_c$  maps

- 1 contoured at the  $3\sigma$  levels. The iodine atoms form an equilateral triangle with side lengths
- 2  $\sim 6\text{\AA}$ .
- 3

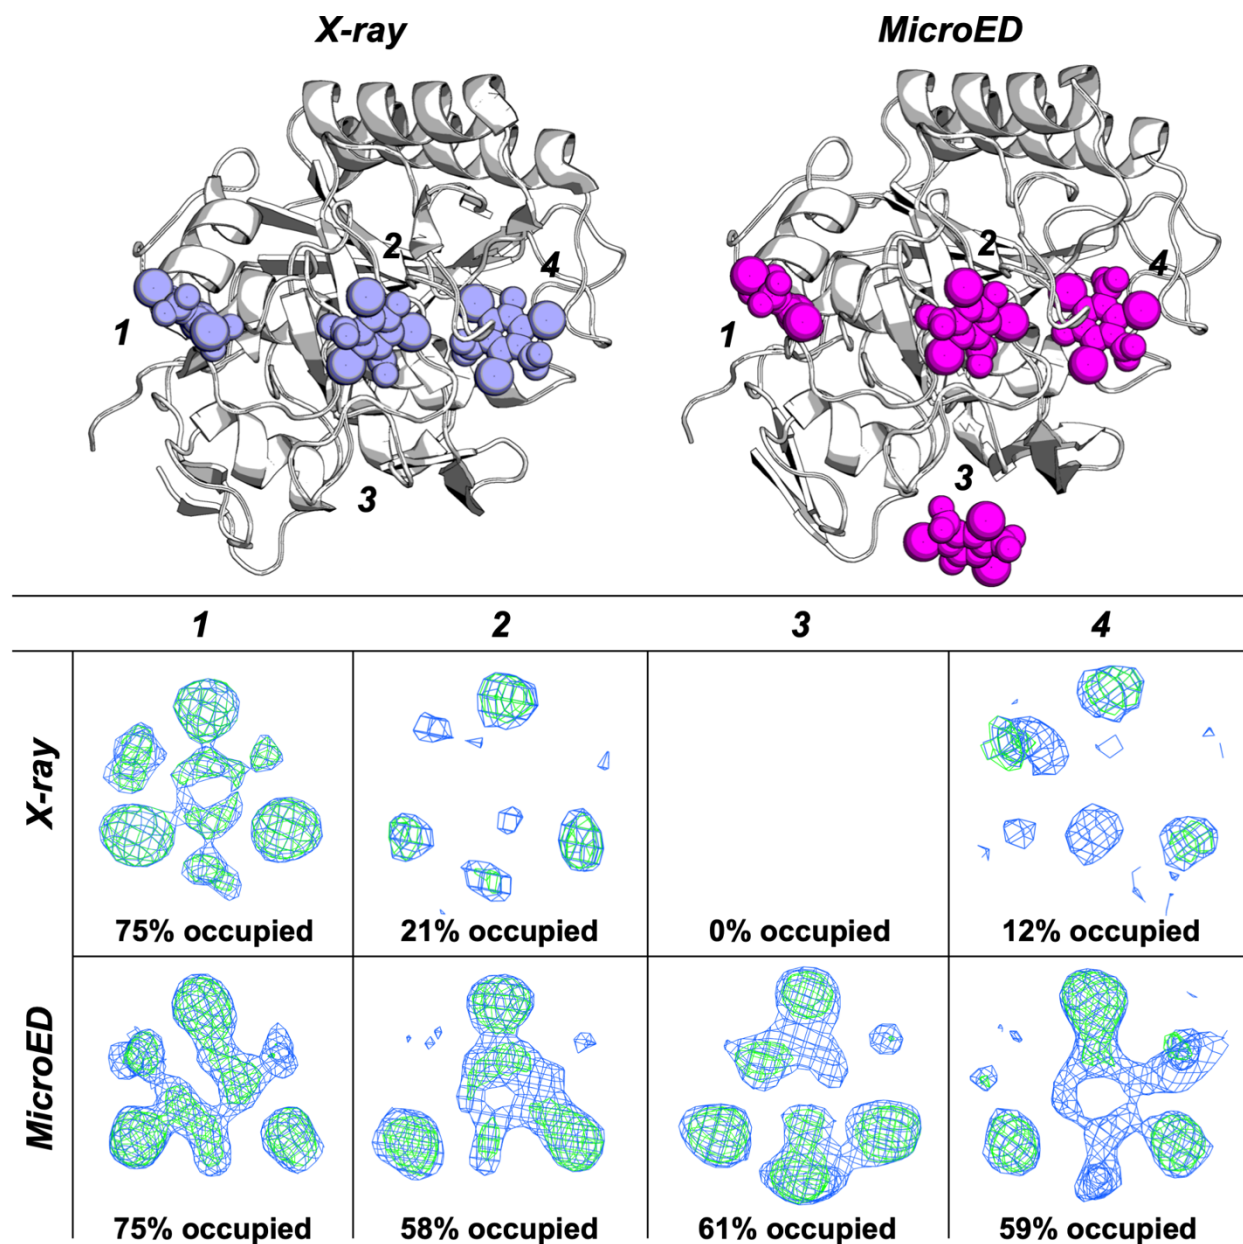

**Figure 4**

- 4
- 5 **Figure 4. Comparison of ligand placement between a microcrystal determined by**
- 6 **MicroED and a large crystal determined using X-ray diffraction. (Top left) MicroED**

1 (beige) and X-ray determined (light blue) structures overlaid with their bound ligands. The  
2 overall Ca RMSD between the models is 0.18 Å. (Right and bottom) For each numbered  
3 ligand, the corresponding  $2F_o-F_c$  and  $F_o-F_c$  densities using only the protein phases are  
4 shown with the MicroED on the left and X-ray on the right for comparison. Ligand 3 in the  
5 X-ray structure was not observed. All  $2F_o-F_c$  maps are contoured at the 1s level, and  $F_o-$   
6  $F_c$  maps are contoured at the 3s level. Maps are presented with a 1.75 Å carve for clarity.  
7 Density maps for each are calculated at 1.78 Å resolution. A sulfate ion appears in place  
8 of I3C in site 3 for the X-ray structure, and was omitted for clarity.

9

## 10 **References**

- 11 Afonine P V., Grosse-Kunstleve RW, Echols N, Headd JJ, Moriarty NW, Mustyakimov  
12 M, Terwilliger TC, Urzhumtsev A, Zwart PH, Adams PD. 2012. Towards automated  
13 crystallographic structure refinement with phenix.refine. *Acta Crystallogr Sect D*  
14 *Biol Crystallogr* **68**:352–367. doi:10.1107/S0907444912001308
- 15 Beck T, Da Cunha CE, Sheldrick GM. 2009. How to get the magic triangle and the MAD  
16 triangle into your protein crystal. *Acta Crystallogr Sect F Struct Biol Cryst Commun*  
17 **65**:1068–1070. doi:10.1107/S1744309109036884
- 18 Beck T, Gruene T, Sheldrick GM. 2010. The magic triangle goes MAD: experimental  
19 phasing with a bromine derivative. *Acta Crystallogr Sect D Biol Crystallogr* **66**:374–  
20 380. doi:10.1107/S0907444909051609
- 21 Beck T, Krasauskas A, Gruene T, Sheldrick GM. 2008. A magic triangle for  
22 experimental phasing of macromolecules. *Acta Crystallogr Sect D Biol Crystallogr*  
23 **64**:1179–1182. doi:10.1107/S0907444908030266

- 1 Blundell TL. 2017. Protein crystallography and drug discovery: recollections of  
2 knowledge exchange between academia and industry. *IUCrJ* **4**:308–321.  
3 doi:10.1107/S2052252517009241
- 4 Clabbers MTB, Fisher SZ, Coincon M, Zou X, Xu H. 2020. Visualizing drug inhibitor  
5 binding interactions using microcrystal electron diffraction. *bioRxiv Mol Biol*.  
6 doi:<https://doi.org/10.1101/2020.04.27.064188>
- 7 Clabbers MTB, Gruene T, Parkhurst JM, Abrahams JP, Waterman DG. 2018. Electron  
8 diffraction data processing with DIALS. *Acta Crystallogr Sect D Struct Biol* **74**:506–  
9 518. doi:10.1107/S2059798318007726
- 10 Clabbers MTB, van Genderen E, Wan W, Wiegers EL, Gruene T, Abrahams JP. 2017.  
11 Protein structure determination by electron diffraction using a single three-  
12 dimensional nanocrystal. *Acta Crystallogr Sect D Struct Biol* **73**:738–748.  
13 doi:10.1107/S2059798317010348
- 14 Daga P, Patel R, Doerksen R. 2010. Template-Based Protein Modeling: Recent  
15 Methodological Advances. *Curr Top Med Chem* **10**:84–94.  
16 doi:10.2174/156802610790232314
- 17 Datta S, Grant DJW. 2004. Crystal structures of drugs: advances in determination,  
18 prediction and engineering. *Nat Rev Drug Discov* **3**:42–57. doi:10.1038/nrd1280
- 19 de la Cruz MJ, Hattne J, Shi D, Seidler P, Rodriguez J, Reyes FE, Sawaya MR, Cascio  
20 D, Weiss SC, Kim SK, Hinck CS, Hinck AP, Calero G, Eisenberg D, Gonen T.  
21 2017. Atomic-resolution structures from fragmented protein crystals with the  
22 cryoEM method MicroED. *Nat Methods* **14**:399–402. doi:10.1038/nmeth.4178
- 23 Duyvesteyn HME, Kotecha A, Ginn HM, Hecksel CW, Beale E V., de Haas F, Evans G,

- 1 Zhang P, Chiu W, Stuart DI. 2018. Machining protein microcrystals for structure  
2 determination by electron diffraction. *Proc Natl Acad Sci* **115**:9569–9573.  
3 doi:10.1073/pnas.1809978115
- 4 Emsley P, Cowtan K. 2004. Coot: Model-building tools for molecular graphics. *Acta*  
5 *Crystallogr Sect D Biol Crystallogr* **60**:2126–2132.  
6 doi:10.1107/S0907444904019158
- 7 Evans PR, Murshudov GN. 2013. How good are my data and what is the resolution?  
8 *Acta Crystallogr Sect D Biol Crystallogr* **69**:1204–1214.  
9 doi:10.1107/S0907444913000061
- 10 Geremia S, Campagnolo M, Demitri N, Johnson LN. 2006. Simulation of Diffusion Time  
11 of Small Molecules in Protein Crystals. *Structure* **14**:393–400.  
12 doi:10.1016/j.str.2005.12.007
- 13 Gruene T, Wennmacher JTC, Zaubitzer C, Holstein JJ, Heidler J, Fecteau-Lefebvre A,  
14 De Carlo S, Müller E, Goldie KN, Regeni I, Li T, Santiso-Quinones G, Steinfeld G,  
15 Handschin S, van Genderen E, van Bokhoven JA, Clever GH, Pantelic R. 2018.  
16 Rapid Structure Determination of Microcrystalline Molecular Compounds Using  
17 Electron Diffraction. *Angew Chemie Int Ed* **57**:16313–16317.  
18 doi:10.1002/anie.201811318
- 19 Hattne J, Martynowycz MW, Penczek PA, Gonen T. 2019. MicroED with the Falcon III  
20 direct electron detector. *IUCrJ* **6**:921–926. doi:10.1107/S2052252519010583
- 21 Hattne J, Reyes FE, Nannenga BL, Shi D, De La Cruz MJ, Leslie AGW, Gonen T. 2015.  
22 MicroED data collection and processing. *Acta Crystallogr Sect A Found Adv*  
23 **71**:353–360. doi:10.1107/S2053273315010669

- 1 Hattne J, Shi D, De La Cruz MJ, Reyes FE, Gonen T. 2016. Modeling truncated pixel  
2 values of faint reflections in MicroED images. *J Appl Crystallogr* **49**:1029–1034.  
3 doi:10.1107/S1600576716007196
- 4 Hattne J, Shi D, Glynn C, Zee C-TC-T, Gallagher-Jones M, Martynowycz MWMW,  
5 Rodriguez JAJA, Gonen T. 2018. Analysis of Global and Site-Specific Radiation  
6 Damage in Cryo-EM. *Structure* **26**:759-766.e4. doi:10.1016/j.str.2018.03.021
- 7 He Z, Zhang J, Shi X-H, Hu L-L, Kong X, Cai Y-D, Chou K-C. 2010. Predicting Drug-  
8 Target Interaction Networks Based on Functional Groups and Biological Features.  
9 *PLoS One* **5**:e9603. doi:10.1371/journal.pone.0009603
- 10 Jason de la Cruz M, Martynowycz MW, Hattne J, Gonen T. 2019. MicroED data  
11 collection with SerialEM. *Ultramicroscopy* **201**:1–4.  
12 doi:10.1016/j.ultramic.2019.03.009
- 13 Jones CG, Martynowycz MW, Hattne J, Fulton TJ, Stoltz BM, Rodriguez JA, Nelson  
14 HM, Gonen T. 2018. The CryoEM Method MicroED as a Powerful Tool for Small  
15 Molecule Structure Determination. *ACS Cent Sci* **4**:1587–1592.  
16 doi:10.1021/acscentsci.8b00760
- 17 Karplus PA, Diederichs K. 2012. Linking Crystallographic Model and Data Quality.  
18 *Science (80- )* **336**:1030–1033. doi:10.1126/science.1218231
- 19 Kuhn P, Wilson K, Patch MG, Stevens RC. 2002. The genesis of high-throughput  
20 structure-based drug discovery using protein crystallography. *Curr Opin Chem Biol*  
21 **6**:704–710. doi:10.1016/S1367-5931(02)00361-7
- 22 Lebioda L, Zhang E. 1992. Soaking of crystals for macromolecular crystallography in a  
23 capillary. *J Appl Crystallogr* **25**:323–324. doi:10.1107/S0021889891011342

- 1 Liebschner D, Afonine P V., Moriarty NW, Poon BK, Sobolev O V., Terwilliger TC,  
2 Adams PD. 2017. Polder maps: improving OMIT maps by excluding bulk solvent.  
3 *Acta Crystallogr Sect D Struct Biol* **73**:148–157. doi:10.1107/S2059798316018210
- 4 López-Jaramillo FJ, Moraleda AB, González-Ramírez LA, Carazo A, García-Ruiz JM.  
5 2002. Soaking: the effect of osmotic shock on tetragonal lysozyme crystals. *Acta*  
6 *Crystallogr Sect D Biol Crystallogr* **58**:209–214. doi:10.1107/S090744490101914X
- 7 Martynowycz M, Glynn C, Miao J, de la Cruz MJ, Hattne J, Shi D, Cascio D, Rodriguez  
8 J, Gonen T. 2017. MicroED Structures from Micrometer Thick Protein Crystals.  
9 *bioRxiv*. doi:10.1101/152504
- 10 Martynowycz MW, Hattne J, Gonen T. 2020. Experimental Phasing of MicroED Data  
11 Using Radiation Damage. *Structure* **28**:458-464.e2. doi:10.1016/j.str.2020.01.008
- 12 Martynowycz Michael W., Zhao W, Hattne J, Jensen GJ, Gonen T. 2019. Collection of  
13 Continuous Rotation MicroED Data from Ion Beam-Milled Crystals of Any Size.  
14 *Structure* **27**:545-548.e2. doi:10.1016/j.str.2018.12.003
- 15 Martynowycz Michael W, Zhao W, Hattne J, Jensen GJ, Gonen T. 2019. Qualitative  
16 Analyses of Polishing and Precoating FIB Milled Crystals for MicroED. *Structure*  
17 **27**:1594-1600.e2. doi:10.1016/j.str.2019.07.004
- 18 McCoy AJ, Grosse-Kunstleve RW, Adams PD, Winn MD, Storoni LC, Read RJ. 2007.  
19 Phaser crystallographic software. *J Appl Crystallogr* **40**:658–674.  
20 doi:10.1107/S0021889807021206
- 21 McNae IW, Kan D, Kontopidis G, Patterson A, Taylor P, Worrall L, Walkinshaw MD.  
22 2005. Studying protein–ligand interactions using protein crystallography. *Crystallogr*  
23 *Rev* **11**:61–71. doi:10.1080/08893110500078639



- 1 Moriarty NW, Grosse-Kunstleve RW, Adams PD. 2009. electronic Ligand Builder and  
2 Optimization Workbench ( eLBOW ): a tool for ligand coordinate and restraint  
3 generation. *Acta Crystallogr Sect D Biol Crystallogr* **65**:1074–1080.  
4 doi:10.1107/S0907444909029436
- 5 Nannenga Brent L., Shi D, Hattne J, Reyes FE, Gonen T. 2014. Structure of catalase  
6 determined by MicroED. *Elife* **3**:e03600. doi:10.7554/eLife.03600
- 7 Nannenga Brent L, Shi D, Leslie AGW, Gonen T. 2014. High-resolution structure  
8 determination by continuous-rotation data collection in MicroED. *Nat Methods*  
9 **11**:927–930. doi:10.1038/nmeth.3043
- 10 Parkhurst JM, Winter G, Waterman DG, Fuentes-Montero L, Gildea RJ, Murshudov GN,  
11 Evans G. 2016. Robust background modelling in DIALS. *J Appl Crystallogr*  
12 **49**:1912–1921. doi:10.1107/S1600576716013595
- 13 Pearce NM, Krojer T, von Delft F. 2017. Proper modelling of ligand binding requires an  
14 ensemble of bound and unbound states. *Acta Crystallogr Sect D Struct Biol*  
15 **73**:256–266. doi:10.1107/S2059798317003412
- 16 Pozharski E, Weichenberger CX, Rupp B. 2013. Techniques, tools and best practices  
17 for ligand electron-density analysis and results from their application to deposited  
18 crystal structures. *Acta Crystallogr Sect D Biol Crystallogr* **69**:150–167.  
19 doi:10.1107/S0907444912044423
- 20 Purdy MD, Shi D, Chrustowicz J, Hattne J, Gonen T, Yeager M. 2018. MicroED  
21 structures of HIV-1 Gag CTD-SP1 reveal binding interactions with the maturation  
22 inhibitor bevirimat. *Proc Natl Acad Sci* **115**:13258–13263.  
23 doi:10.1073/pnas.1806806115

- 1 Reynolds CH. 2014. Protein–Ligand Cocrystal Structures: We Can Do Better. *ACS Med*  
2 *Chem Lett* **5**:727–729. doi:10.1021/ml500220a
- 3 Rodriguez JA, Ivanova MI, Sawaya MR, Cascio D, Reyes FE, Shi D, Sangwan S,  
4 Guenther EL, Johnson LM, Zhang M, Jiang L, Arbing MA, Nannenga BL, Hattne J,  
5 Whitelegge J, Brewster AS, Messerschmidt M, Boutet S, Sauter NK, Gonen T,  
6 Eisenberg DS. 2015. Structure of the toxic core of  $\alpha$ -synuclein from invisible  
7 crystals. *Nature* **525**:486–490. doi:10.1038/nature15368
- 8 Schindelin J, Arganda-Carreras I, Frise E, Kaynig V, Longair M, Pietzsch T, Preibisch S,  
9 Rueden C, Saalfeld S, Schmid B, Tinevez J-Y, White DJ, Hartenstein V, Eliceiri K,  
10 Tomancak P, Cardona A. 2012. Fiji: an open-source platform for biological-image  
11 analysis. *Nat Methods* **9**:676–682. doi:10.1038/nmeth.2019
- 12 Schrödinger LLC. 2014. The PyMOL Molecular Graphics System.
- 13 Seidler PM, Boyer DR, Rodriguez JA, Sawaya MR, Cascio D, Murray K, Gonen T,  
14 Eisenberg DS. 2018. Structure-based inhibitors of tau aggregation. *Nat Chem*  
15 **10**:170–176. doi:10.1038/nchem.2889
- 16 Shi D, Nannenga BL, Iadanza MG, Gonen T. 2013. Three-dimensional electron  
17 crystallography of protein microcrystals. *Elife* **2013**:e01345.  
18 doi:10.7554/eLife.01345.001
- 19 Tickle I, Sharff A, Vinkovits M, Yon J, Jhoti H. 2004. High-throughput protein  
20 crystallography and drug discovery. *Chem Soc Rev* **33**:558. doi:10.1039/b314510g
- 21 Unwin N. 1995. Acetylcholine receptor channel imaged in the open state. *Nature*  
22 **373**:37–43. doi:10.1038/373037a0
- 23 Waterman DG, Winter G, Gildea RJ, Parkhurst JM, Brewster AS, Sauter NK, Evans G.

- 1           2016. Diffraction-geometry refinement in the DIALS framework. *Acta Crystallogr*  
2           *Sect D, Struct Biol* **72**:558–575. doi:10.1107/S2059798316002187
- 3 Winter G, Waterman DG, Parkhurst JM, Brewster AS, Gildea RJ, Gerstel M, Fuentes-  
4           Montero L, Vollmar M, Michels-Clark T, Young ID, Sauter NK, Evans G. 2018.  
5           DIALS : implementation and evaluation of a new integration package. *Acta*  
6           *Crystallogr Sect D Struct Biol* **74**:85–97. doi:10.1107/S2059798317017235
- 7 Wolff AM, Young ID, Sierra RG, Brewster AS, Martynowycz MW, Nango E, Sugahara  
8           M, Nakane T, Ito K, Aquila A, Bhowmick A, Biel JT, Carbajo S, Cohen AE, Cortez  
9           S, Gonzalez A, Hino T, Im D, Koralek JD, Kubo M, Lazarou TS, Nomura T, Owada  
10          S, Samelson AJ, Tanaka T, Tanaka R, Thompson EM, van den Bedem H,  
11          Woldeyes RA, Yumoto F, Zhao W, Tono K, Boutet S, Iwata S, Gonen T, Sauter NK,  
12          Fraser JS, Thompson MC. 2020. Comparing serial X-ray crystallography and  
13          microcrystal electron diffraction (MicroED) as methods for routine structure  
14          determination from small macromolecular crystals. *IUCrJ* **7**:306–323.  
15          doi:10.1107/S205225252000072X
- 16 Xu H, Lebrette H, Clabbers MTB, Zhao J, Griese JJ, Zou X, Högbom M. 2019. Solving a  
17          new R2lox protein structure by microcrystal electron diffraction. *Sci Adv*  
18          **5**:eaax4621. doi:10.1126/sciadv.aax4621
- 19
